# Supplementary material for: Reduced Local Response to Corticosteroids in Eosinophilic Chronic Rhinosinusitis with Asthma
Source: Biomolecules. 2020 Feb 18;10(2):326. doi: 10.3390/biom10020326 (PMC7072408; doi:10.3390/biom10020326)
Supplement: Supplementary file 1 [file biomolecules-10-00326-s001.zip]

Archive with 4 entries (4 files):
- Supplementary Figures.pdf
- __MACOSX/._Supplementary Figures.pdf
- Supplementary Tables.pdf
- __MACOSX/._Supplementary Tables.pdf
