# Supplementary material for: Reduced Local Response to Corticosteroids in Eosinophilic Chronic Rhinosinusitis with Asthma
Source: Biomolecules. 2020 Feb 18;10(2):326. doi: 10.3390/biom10020326 (PMC7072408; doi:10.3390/biom10020326)
Supplement: Supplementary file 1 [file biomolecules-10-00326-s001.zip › Supplementary Figures.pdf]

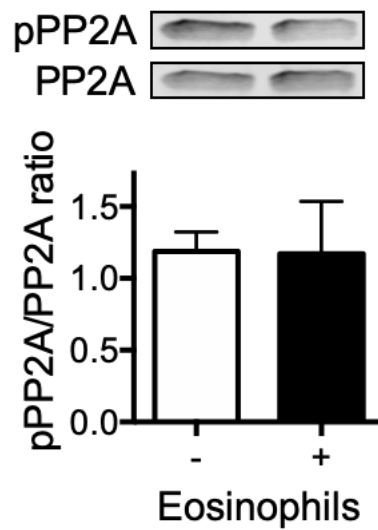

**Figure S1.** PP2A phosphorylation in BEAS-2B cells co-incubated with non-activated eosinophils. BEAS-2B cells were co-incubated with purified blood eosinophils for 3 days. Phosphorylation levels of PP2A were evaluated. Data are expressed as the ratio to PP2A and the values represent the mean  $\pm$  SEM values of three experiments.

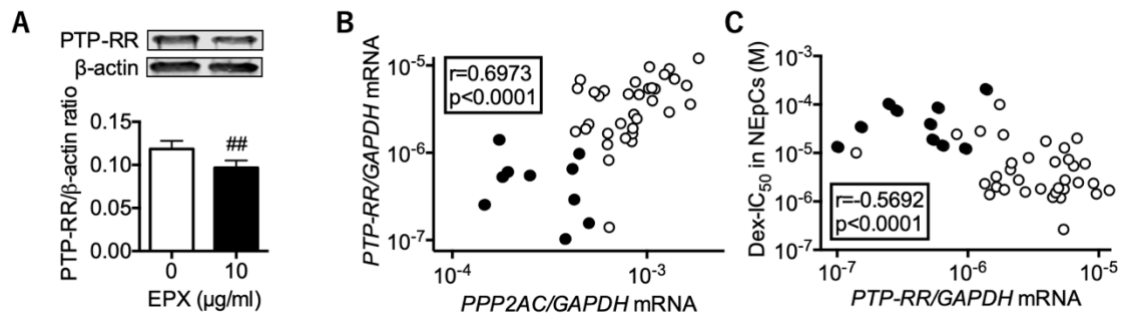

**Figure S2.** Involvement of PTP-RR in corticosteroid sensitivity. **A**, PTP-RR protein expression in BEAS-2B cells co-incubated with recombinant eosinophil peroxidase (EPX) for 3 days. Values represent the mean  $\pm$  SEM values of four experiments:  $^{##}p < 0.01$  (vs. vehicle).  $\beta$ -actin bands were the same bands in Figure 2B. **B**, Correlation between PTP-RR and PP2A mRNA levels in nasal epithelial cells (NEpCs). **C**, Correlation between Dex-IC<sub>50</sub> and PTP-RR mRNA levels in NEpCs. The filled circles indicate individual values of ECRS patients with severe asthma.

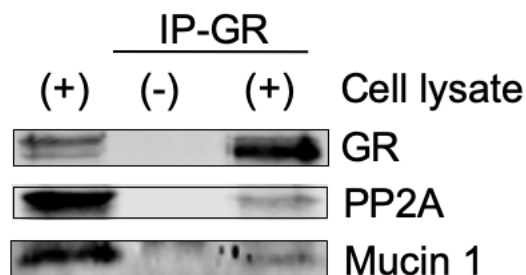

**Figure S3.** PP2A and mucin 1 expression in GR-immunoprecipitates. GR, PP2A and Mucin 1 were detected in whole cell extracts (left lane) and in GR-immunoprecipitates (right lane).
