# Supplementary material for: Reduced Local Response to Corticosteroids in Eosinophilic Chronic Rhinosinusitis with Asthma
Source: Biomolecules. 2020 Feb 18;10(2):326. doi: 10.3390/biom10020326 (PMC7072408; doi:10.3390/biom10020326)
Supplement: Supplementary file 1 [file biomolecules-10-00326-s001.zip › Supplementary Tables.pdf]

**Table S1.** Patients' characteristics

|                                   | HV<br>(n=10)  | ECRS<br>w/o asthma (n=6) | ECRS<br>with NSA (n=10) | ECRS<br>with SA (n=12)         | Non-ECRS<br>(n=10) | AR<br>(n=5)  |
|-----------------------------------|---------------|--------------------------|-------------------------|--------------------------------|--------------------|--------------|
| Age                               | 54.2 ± 12.2   | 55.8 ± 11.0              | 56.5 ± 13.5             | 62.5 ± 6.4                     | 59.8 ± 15.4        | 34.2 ± 23.8  |
| Gender (M/F)                      | 3/7           | 4/2                      | 4/6                     | 7/5                            | 9/1                | 4/1          |
| Smoking status (never/ex)         | 9/1           | 2/4                      | 4/6                     | 6/6                            | 4/6                | 4/1          |
| Eosinophils (per µL)              | 186 ± 122     | 263 ± 212                | 390 ± 222               | 509 ± 592                      | 227 ± 163          | 243 ± 196    |
| FEV <sub>1</sub> (%predicted)     | 92.9 ± 8.6*   | 97.7 ± 9.2**             | 85.1 ± 15.4             | 64.3 ± 19.9                    | 94.2 ± 13.5**      | 87.0 ± 10.8  |
| FEV <sub>1</sub> /FVC             | 81.1 ± 5.5*   | 81.5 ± 3.8*              | 75.3 ± 7.7              | 64.3 ± 15.1                    | 74.9 ± 7.7         | 84.4 ± 5.6** |
| FEF <sub>25-75</sub> (%predicted) | 76.1 ± 17.1** | 83.3 ± 20.8**            | 55.3 ± 20.7             | 35.0 ± 17.7                    | 63.5 ± 24.6        | 73.3 ± 20.3  |
| Treatment                         |               |                          |                         |                                |                    |              |
| ICS (µg) <sup>1)</sup>            | none          | none                     | 690 ± 260               | 892 ± 312                      | none               | none         |
| LABA                              | 0             | 0                        | 7                       | 12                             | 0                  | 0            |
| LTRA                              | 0             | 1                        | 6                       | 9                              | 0                  | 3            |
| Anti-histamine                    | 0             | 0                        | 1                       | 6                              | 1                  | 2            |
| INS                               | 0             | 4                        | 5                       | 10                             | 0                  | 1            |
| OCS                               | 0             | 0                        | 0                       | 3 [ 1.8 ± 0.6mg] <sup>2)</sup> | 0                  | 0            |
| Macrolide                         | 0             | 1                        | 0                       | 2                              | 3                  | 0            |

AR: allergic rhinitis; ECRS: eosinophilic chronic rhinosinusitis; FEF<sub>25-75</sub>: forced expiratory flow between 25% and 75% of vital capacity; FEV<sub>1</sub>: forced expiratory volume in 1 second; FVC: forced vital capacity; HV: healthy volunteers; ICS: inhaled corticosteroid; INS: inhaled nasal corticosteroid; LABA: long-acting β<sub>2</sub>-adrenergic agonist; LTRA: leukotriene receptor antagonist; NSA: non-severe asthmatics; OCS: oral corticosteroid; SA: severe asthmatics, <sup>1)</sup> fluticasone propionate equivalent dose, <sup>2)</sup> prednisolone equivalent dose, \*P<0.05, \*\*P<0.01 (vs. ECRS with SA)

**Table S2.** Amplification primers (5'–3')

| gene          | forward                             | reverse                             |
|---------------|-------------------------------------|-------------------------------------|
| <i>PPP2CA</i> | CGC CAT TAC AGA GAG CCG AG          | GTA CTT CTG GCG GCT GTT GA          |
| <i>PTP-RR</i> | TGG TTT GGC AGG AAG ACA GC          | TTT CCG GCC AGT ATA GCA CAC         |
| <i>TSLP</i>   | CCG CCT ATG AGC AGC CAC             | CCT CAG TAG CAT TTA TCT CAG         |
| <i>IL-25</i>  | GAG ATA TGA GTT GGA CAG AGA CTT GAA | CCA TGT GGG AGC CTG TCT GTA         |
| <i>IL-33</i>  | GAA GAA CAC AGC AAG CAA AGC         | TAC CAA AGG CAA AGC ACT CC          |
| <i>CCL4</i>   | CTC CTC ATG CTA GTA GCT GCC TTC     | GGT GTA AGA AAA GCA GCA GGC GGT     |
| <i>CCL5</i>   | GTT GCA CCA AGC TAT GCA GGT         | GCA GAA GCG TTT GGC AAT GT          |
| <i>CCL11</i>  | CCA CAC TGA AGG TCT CCG CA          | TCT CTA GTC GCT GAA GGG GT          |
| <i>CCL26</i>  | ACT CCG AAA CAA TTG TGA CTC AGC TG  | GTA ACT CTG GGA GGA AAC ACC CTC TCC |
| <i>GAPDH</i>  | TTC ACC ACC ATG GAG AAG GC          | AGG AGG CAT TGC TGA TGA TCT         |
